# Supplementary material
Source: PubMed Central journal article supplement (PMC4851891)
Supplement: NIHMS778075-supplement.pdf [file NIHMS778075-supplement.pdf]

**Online Supplementary Table 1. PCR primers.<sup>1</sup>**

| <b>Gene</b>                   | <b>Primers</b>                                                           |
|-------------------------------|--------------------------------------------------------------------------|
| Mouse 18S ribosomal RNA       | FWD 5'-CTGAGAAACGGCTACCACATC-3'<br>REV 5'-GCCTCGAAAGAGTCCTGTATTG-3'      |
| Mouse PPAR $\gamma$ variant 2 | FWD 5'-AGATTCTCCTGTTGACCCAGAGCA-3'<br>REV 5'-ATTCCGAAGTTGGTGGGCCAGAAT-3' |
| Mouse FABP4                   | FWD 5'-ATGAAATCACCGCAGACGACAGGA-3'<br>REV 5'-TGTGGTCGACTTTCATCCCACTT-3'  |

<sup>1</sup>Abbreviations: FABP4, fatty acid binding protein 4; FWD, forward; PPAR $\gamma$ , peroxisome proliferator-activated receptor gamma; REV, reverse.
